# Supplementary material for: An overview of the expert consensus on the mental health treatment and services for major psychiatric disorders during COVID-19 outbreak: China's experiences
Source: PubMed Central journal article supplement (PMC7378640; doi:10.7150/ijbs.47419), 2020-05-25
Supplement: ijbsv16p2265s1.pdf [file ijbsv16p2265s1.pdf]

Supplementary tables

Membership of the Group for the Expert Recommendations on Managing Patients with Mental Disorders during COVID-19 [9]

|                                                                                     |                                                                                |
|-------------------------------------------------------------------------------------|--------------------------------------------------------------------------------|
| Institute of Mental Health, The Second Xiangya Hospital of Central South University | Xilong Cui<br>Lingjiang Li<br>Xiaoping Wang<br>Jingping Zhao                   |
| Mental Health Center of Shanghai Jiao Tong University School of Medicine            | Yiru Fang<br>Kaida Jiang<br>Bin Xie<br>Yifeng Xu<br>Mingyuan Zhang<br>Min Zhao |
| The First Affiliated Hospital of Chongqing Medical University                       | Li Kuang                                                                       |
| West China Hospital of Sichuan University                                           | Tao Li                                                                         |
| Anhui Mental Health Center                                                          | Xiaosi Li                                                                      |
| Wuhan Mental Health Center                                                          | Yi Li                                                                          |
| Beijing Anding Hospital, Capital Medical University                                 | Zhanjiang Li                                                                   |
| The Sixth People's Hospital of Hebei Province                                       | Keqing Li                                                                      |
| Hubei Jingzhou Psychiatric Hospital                                                 | Bo Liu                                                                         |
| Shenzhen Kangning Hospital                                                          | Tiebang Liu                                                                    |
| The Sixth Hospital of Peking University                                             | Lin Lu<br>Tianmei Si<br>Xin Yu                                                 |
| The First Affiliated Hospital of Xi 'An Jiaotong University                         | Xianchang Ma                                                                   |
| Huashan Hospital of Fudan University                                                | Shenxun Shi                                                                    |
| The First Affiliated Hospital of China Medical University                           | Yanqing Tang                                                                   |
| People's Hospital of Wuhan University                                               | Gaohua Wang                                                                    |
| Beijing Huilongguan Hospital                                                        | Shaoli Wang                                                                    |
| Shanghai Hongkou Mental Health Center                                               | Zuowei Wang                                                                    |
| The First Affiliated Hospital of Kunming Medical University                         | Xiufeng Xu                                                                     |
| The Affiliated Cancer Hospital of Chinese Academy of Sciences University            | Enyan Yu                                                                       |
| The General Hospital of Tianjin Medical University                                  | Jianli Yang                                                                    |
| Brain Hospital of Nanjing Medical University                                        | Ning Zhang                                                                     |
| The People's Hospital of Xinjiang Uygur Autonomous Region                           | Shaohong Zou                                                                   |

Membership of the Group for the Expert Recommendations on Internet and Telehealth in Psychiatry during Major Public Health Crises (COVID-19) [11]

|                                                             |                                                 |
|-------------------------------------------------------------|-------------------------------------------------|
| The First Affiliated Hospital of Harbin Medical University  | Jian Hu                                         |
| Guangdong Provincial People's Hospital                      | Fujun Jia                                       |
| Tianjin Anding Hospital                                     | Jie Li                                          |
| The Second Xiangya Hospital of Central South University     | Lingjiang Li<br>Xiaoping Wang                   |
| West China Hospital of Sichuan University                   | Tao Li                                          |
| The Sixth People's Hospital of Hebei Province               | Keqing Li                                       |
| Shenzhen Kangning Hospital                                  | Tiebang Liu                                     |
| The People's Hospital of Wuhan University                   | Zhongchun Liu<br>Gaohua Wang                    |
| The Sixth Hospital of Peking University                     | Lin Lu<br>Zhaojun Ni<br>Hongqiang Sun<br>Xin Yu |
| Tongji Hospital of Tongji University                        | Zheng Lu                                        |
| The First Affiliated Hospital of Xi 'An Jiaotong University | Xiancang Ma                                     |
| Brain Hospital of Guangzhou Medical University              | Yuping Ning                                     |
| The Seventh People's Hospital of Hangzhou                   | Hongjing Mao                                    |
| Huashan Hospital of Fudan University                        | Shenxun Shi                                     |
| Xijing Hospital of Air Force Medical University             | Qingrong Tan                                    |
| Sichuan Zigong Mental Health Center                         | Youguo Tan                                      |
| The First Affiliated Hospital of China Medical University   | Yanqing Tang                                    |
| Beijing Anding Hospital of Capital Medical University       | Gang Wang                                       |
| Shandong Mental Health Center                               | Ruzhan Wang                                     |
| Xiamen Mental Health Center                                 | Wenqiang Wang                                   |
| Shanghai Mental Health Center                               | Zhen Wang<br>Yifeng Xu                          |
| Peking Union Medical University Hospital                    | Jing Wei                                        |
| The First Affiliated Hospital of Zhejiang University        | Yi Xu                                           |
| The First Affiliated Hospital of Kunming Medical University | Xiufeng Xu                                      |
| Beijing Huilongguan Hospital                                | Fude Yang                                       |
| The General Hospital of Tianjin Medical University          | Jianli Yang                                     |
| Brain Hospital of Nanjing Medical University                | Ning Zhang                                      |
| Dongfang Hospital of Tongji University                      | Xudong Zhao                                     |
| The Second People's Hospital of Guizhou Province            | Cao Zhou                                        |
